# Supplementary material
Source: PubMed Central journal article supplement (PMC8323057)
Supplement: NIHMS1726611-supplement-Supplementary_Materials.pdf [file NIHMS1726611-supplement-Supplementary_Materials.pdf]

**APPENDIX**

**Exhibit A – Odds of reporting no usual source of care in the past year among Medicare Beneficiaries by functional hearing difficulty<sup>a,b</sup>**

| Variable                                       | Odds Ratio | 95% Confidence Interval |         | Standard Error | P-Value |
|------------------------------------------------|------------|-------------------------|---------|----------------|---------|
|                                                |            | Lower                   | Upper   |                |         |
| <b>Functional Hearing Difficulty</b>           |            |                         |         |                |         |
| No Trouble                                     |            | REF                     |         |                |         |
| A Little Trouble                               | 1.038      | 0.814                   | - 1.322 | 0.127          | 0.762   |
| A Lot of Trouble                               | 1.489      | 1.034                   | - 2.143 | 0.273          | 0.033   |
| <b>Age (years)</b>                             |            |                         |         |                |         |
| 65-69                                          |            | REF                     |         |                |         |
| 70-74                                          | 0.771      | 0.567                   | - 1.049 | 0.120          | 0.096   |
| 75-79                                          | 0.950      | 0.702                   | - 1.285 | 0.145          | 0.735   |
| 80-84                                          | 0.674      | 0.468                   | - 0.971 | 0.124          | 0.034   |
| 85-89                                          | 0.710      | 0.484                   | - 1.043 | 0.138          | 0.081   |
| 90+                                            | 0.609      | 0.385                   | - 0.961 | 0.140          | 0.033   |
| <b>Female</b>                                  | 0.760      | 0.599                   | - 0.964 | 0.091          | 0.024   |
| <b>Race/Ethnicity</b>                          |            |                         |         |                |         |
| Non-Hispanic White                             |            | REF                     |         |                |         |
| Non-Hispanic Black                             | 1.187      | 0.772                   | - 1.825 | 0.257          | 0.431   |
| Hispanic                                       | 1.418      | 0.816                   | - 2.463 | 0.395          | 0.212   |
| Other                                          | 1.178      | 0.663                   | - 2.094 | 0.341          | 0.573   |
| <b>Educational attainment</b>                  |            |                         |         |                |         |
| Less than high school                          |            | REF                     |         |                |         |
| High school graduate                           | 0.863      | 0.609                   | - 1.223 | 0.152          | 0.405   |
| Vocational, some college, associates           | 0.918      | 0.648                   | - 1.300 | 0.161          | 0.627   |
| Bachelors or higher degree                     | 0.615      | 0.405                   | - 0.932 | 0.129          | 0.023   |
| <b>Income to Poverty Ratio</b>                 |            |                         |         |                |         |
| Less than 100%                                 |            | REF                     |         |                |         |
| 101-200%                                       | 0.858      | 0.593                   | - 1.243 | 0.160          | 0.416   |
| Greater than 200%                              | 0.603      | 0.417                   | - 0.873 | 0.112          | 0.008   |
| <b>Currently Married = Yes</b>                 | 0.558      | 0.431                   | - 0.723 | 0.073          | <0.001  |
| <b>Medicare Advantage = Yes</b>                | 0.651      | 0.497                   | - 0.853 | 0.089          | 0.002   |
| <b>General health</b>                          |            |                         |         |                |         |
| Excellent                                      |            | REF                     |         |                |         |
| Very good                                      | 1.119      | 0.825                   | - 1.518 | 0.171          | 0.465   |
| Good                                           | 1.072      | 0.756                   | - 1.518 | 0.188          | 0.695   |
| Fair                                           | 1.450      | 0.922                   | - 2.280 | 0.331          | 0.107   |
| Poor                                           | 1.060      | 0.561                   | - 2.003 | 0.340          | 0.855   |
| <b>Functional Limitations<sup>c</sup></b>      |            |                         |         |                |         |
| No functional limitations                      |            | REF                     |         |                |         |
| 1                                              | 1.297      | 0.879                   | - 1.913 | 0.254          | 0.188   |
| ≥2 ADLs                                        | 0.928      | 0.662                   | - 1.301 | 0.158          | 0.662   |
| <b>Chronic Comorbidities Count<sup>d</sup></b> |            |                         |         |                |         |
| 0                                              |            | REF                     |         |                |         |
| 1-2                                            | 0.268      | 0.194                   | - 0.370 | 0.044          | <0.001  |
| 3-5                                            | 0.106      | 0.074                   | - 0.153 | 0.020          | <0.001  |
| ≥6                                             | 0.174      | 0.101                   | - 0.300 | 0.048          | <0.001  |

<sup>a</sup> Data derived from the 2016 Medicare Current Beneficiary Survey cost and use file (n=10,422)

<sup>b</sup> Survey weights applied according to Medicare Current Beneficiary Survey (weighted n = 44,433,937)

<sup>c</sup> Activities of Daily Living (ADLs) include bathing or showering, dressing, getting in and out of bed or a chair, walking, using the toilet, and eating

<sup>d</sup> Chronic comorbidities count includes cancer, chronic obstructive pulmonary disease/asthma, chronic heart disease, serious mental illness, acute myocardial infarction, hypertension, diabetes, stroke, depression, arthritis, dementia or Alzheimer disease

**Exhibit B – Odds of reporting not obtaining needed medical care and not filling a prescription in the past year among Medicare Beneficiaries by functional hearing difficulty<sup>a,b</sup>**

|                                           | Not Obtaining Medical Care |                         |         |                |         |            | Not Filling Prescription |         |                |         |  |  |
|-------------------------------------------|----------------------------|-------------------------|---------|----------------|---------|------------|--------------------------|---------|----------------|---------|--|--|
|                                           | Odds Ratio                 | 95% Confidence Interval |         | Standard Error | P-Value | Odds Ratio | 95% Confidence Interval  |         | Standard Error | P-Value |  |  |
|                                           |                            | Lower                   | Upper   |                |         |            | Lower                    | Upper   |                |         |  |  |
| <b>Functional Hearing Difficulty</b>      |                            |                         |         |                |         |            |                          |         |                |         |  |  |
| No Trouble                                |                            |                         |         | REF            |         |            |                          |         | REF            |         |  |  |
| A Little Trouble                          | 1.595                      | 1.322                   | - 1.924 | 0.151          | <0.001  | 1.440      | 1.102                    | - 1.882 | 0.194          | 0.008   |  |  |
| A Lot of Trouble                          | 1.854                      | 1.446                   | - 2.376 | 0.232          | <0.001  | 1.556      | 1.044                    | - 2.318 | 0.313          | 0.030   |  |  |
| <b>Age (years)</b>                        |                            |                         |         |                |         |            |                          |         |                |         |  |  |
| 65-69                                     |                            |                         |         | REF            |         |            |                          |         | REF            |         |  |  |
| 70-74                                     | 0.735                      | 0.565                   | - 0.955 | 0.097          | 0.022   | 0.865      | 0.628                    | - 1.190 | 0.139          | 0.368   |  |  |
| 75-79                                     | 0.749                      | 0.595                   | - 0.942 | 0.087          | 0.014   | 0.713      | 0.499                    | - 1.018 | 0.128          | 0.063   |  |  |
| 80-84                                     | 0.534                      | 0.418                   | - 0.682 | 0.066          | <0.001  | 0.413      | 0.285                    | - 0.597 | 0.077          | <0.001  |  |  |
| 85-89                                     | 0.457                      | 0.336                   | - 0.620 | 0.071          | <0.001  | 0.299      | 0.189                    | - 0.471 | 0.069          | <0.001  |  |  |
| 90+                                       | 0.360                      | 0.262                   | - 0.496 | 0.058          | <0.001  | 0.135      | 0.063                    | - 0.289 | 0.052          | <0.001  |  |  |
| <b>Female</b>                             | 1.330                      | 1.093                   | - 1.619 | 0.132          | 0.005   | 1.530      | 1.192                    | - 1.964 | 0.192          | 0.001   |  |  |
| <b>Race/Ethnicity</b>                     |                            |                         |         |                |         |            |                          |         |                |         |  |  |
| Non-Hispanic White                        |                            |                         |         | REF            |         |            |                          |         | REF            |         |  |  |
| Non-Hispanic Black                        | 0.909                      | 0.652                   | - 1.265 | 0.152          | 0.567   | 1.271      | 0.871                    | - 1.857 | 0.243          | 0.211   |  |  |
| Hispanic                                  | 1.010                      | 0.773                   | - 1.318 | 0.136          | 0.944   | 1.298      | 0.871                    | - 1.933 | 0.260          | 0.197   |  |  |
| Other                                     | 1.067                      | 0.680                   | - 1.676 | 0.243          | 0.775   | 0.385      | 0.190                    | - 0.782 | 0.137          | 0.009   |  |  |
| <b>Educational attainment</b>             |                            |                         |         |                |         |            |                          |         |                |         |  |  |
| Less than high school                     |                            |                         |         | REF            |         |            |                          |         | REF            |         |  |  |
| High school graduate                      | 1.061                      | 0.819                   | - 1.375 | 0.138          | 0.651   | 1.101      | 0.833                    | - 1.456 | 0.155          | 0.496   |  |  |
| Vocational, some college, assoc           | 1.044                      | 0.769                   | - 1.416 | 0.161          | 0.782   | 1.386      | 1.021                    | - 1.882 | 0.214          | 0.037   |  |  |
| Bachelors or higher degree                | 1.188                      | 0.841                   | - 1.678 | 0.207          | 0.324   | 1.580      | 1.077                    | - 2.320 | 0.306          | 0.020   |  |  |
| <b>Income to Poverty Ratio</b>            |                            |                         |         |                |         |            |                          |         |                |         |  |  |
| Less than 100%                            |                            |                         |         | REF            |         |            |                          |         | REF            |         |  |  |
| 101-200%                                  | 0.777                      | 0.588                   | - 1.027 | 0.109          | 0.076   | 1.167      | 0.755                    | - 1.806 | 0.257          | 0.483   |  |  |
| Greater than 200%                         | 0.688                      | 0.523                   | - 0.905 | 0.095          | 0.008   | 1.011      | 0.638                    | - 1.602 | 0.235          | 0.962   |  |  |
| <b>Currently Married</b>                  | 0.884                      | 0.724                   | - 1.081 | 0.089          | 0.227   | 0.853      | 0.674                    | - 1.081 | 0.102          | 0.186   |  |  |
| <b>Medicare Advantage</b>                 | 1.065                      | 0.914                   | - 1.242 | 0.082          | 0.414   | 0.755      | 0.620                    | - 0.919 | 0.075          | 0.005   |  |  |
| <b>General health</b>                     |                            |                         |         |                |         |            |                          |         |                |         |  |  |
| Excellent                                 |                            |                         |         | REF            |         |            |                          |         | REF            |         |  |  |
| Very good                                 | 1.812                      | 1.340                   | - 2.450 | 0.276          | <0.001  | 0.846      | 0.583                    | - 1.228 | 0.159          | 0.375   |  |  |
| Good                                      | 1.995                      | 1.468                   | - 2.710 | 0.308          | <0.001  | 1.201      | 0.831                    | - 1.736 | 0.223          | 0.326   |  |  |
| Fair                                      | 3.452                      | 2.361                   | - 5.046 | 0.660          | <0.001  | 1.401      | 0.919                    | - 2.136 | 0.298          | 0.116   |  |  |
| Poor                                      | 3.341                      | 2.255                   | - 4.951 | 0.662          | <0.001  | 1.567      | 0.887                    | - 2.766 | 0.449          | 0.120   |  |  |
| <b>Functional Limitations<sup>c</sup></b> |                            |                         |         |                |         |            |                          |         |                |         |  |  |
| No functional limitations                 |                            |                         |         | REF            |         |            |                          |         | REF            |         |  |  |
| 1 ADL                                     | 1.464                      | 1.127                   | - 1.902 | 0.193          | 0.005   | 1.065      | 0.765                    | - 1.482 | 0.178          | 0.708   |  |  |
| ≥2 ADLs                                   | 1.889                      | 1.455                   | - 2.452 | 0.248          | <0.001  | 1.427      | 1.058                    | - 1.925 | 0.215          | 0.020   |  |  |



**Chronic Comorbidities Count<sup>d</sup>**

|     |       |       |   |       |       |       |       |       |   |       |       |       |
|-----|-------|-------|---|-------|-------|-------|-------|-------|---|-------|-------|-------|
| 0   |       |       |   | REF   |       |       |       |       |   | REF   |       |       |
| 1-2 | 1.130 | 0.763 | - | 1.673 | 0.223 | 0.538 | 2.166 | 1.145 | - | 4.095 | 0.695 | 0.018 |
| 3-5 | 1.196 | 0.815 | - | 1.755 | 0.231 | 0.356 | 2.900 | 1.563 | - | 5.383 | 0.904 | 0.001 |
| ≥6  | 1.383 | 0.904 | - | 2.114 | 0.296 | 0.133 | 3.059 | 1.462 | - | 6.404 | 1.139 | 0.003 |

<sup>a</sup> Data derived from the 2016 Medicare Current Beneficiary Survey cost and use file (n=10,422)

<sup>b</sup> Survey weights applied according to Medicare Current Beneficiary Survey (weighted n = 44,433,937)

<sup>c</sup> Activities of Daily Living (ADLs) include bathing or showering, dressing, getting in and out of bed or a chair, walking, using the toilet, and eating

<sup>d</sup> Chronic comorbidities count includes cancer, chronic obstructive pulmonary disease/asthma, chronic heart disease, serious mental illness, acute myocardial infarction, hypertension, diabetes, stroke, depression, arthritis, dementia or Alzheimer disease
